## 1 **Title**

2 Relationship between high rates of intestinal parasitic infections and knowledge,  
3 attitudes, and practices of Ndelele Health District populations (East Region, Cameroon):  
4 a cross-sectional mixed approach

## 6 **Short Title**

7 Epidemiology of intestinal parasitic infections in the landlocked areas of Eastern  
8 Cameroon

## 10 **Authors and Affiliations**

11 Viviane Ongbassomben<sup>1</sup>, Cyrille Ndo<sup>1,2,3,\*</sup>, Ericka A. Lebon<sup>4</sup>, Hugues C. Nana Djeunga<sup>5</sup>,  
12 Albert L. Same Ekobo<sup>6</sup> and Dieudonné Adiogo<sup>1</sup>

13  
14 <sup>1</sup>Department of Biological Sciences, Faculty of Medicine and Pharmaceutical Sciences,  
15 University of Douala, P.O. Box 24157, Douala, Cameroon. <sup>2</sup>Department of Parasitology  
16 and Micorbiology, Centre for Research in Infectious Disease (CRID), P.O. Box 13591,  
17 Yaoundé, Cameroon. <sup>4</sup>Solutions, Risk Management and Regulatory Framework  
18 Information Technology, P.O. Box 5551014, Montréal, Canada. <sup>5</sup>Molecular Parasitology  
19 and Genetic Epidemiology (MPGE) Department, Centre for Research on Filariasis and  
20 other Tropical Diseases (CRFiMT), P.O. Box 5797, Yaoundé, Cameroon. <sup>6</sup>Faculty of  
21 Medicine and Biomedical Sciences, University of Yaoundé I, P.O. Box 337, Yaoundé,  
22 Cameroon.

23

24 \*Correspondence: Email: [cyrndo@yahoo.fr](mailto:cyrndo@yahoo.fr); Phone: +237 699262003 / +237 677561088;

25 P.O. Box 13591, Yaoundé, Cameroon.

26

27

## 28 **Abstract**

29 **Background:** Intestinal parasitic infections remain of public health concern worldwide,  
30 especially among rural and poorest populations as a consequence of precariousness,  
31 lack of sanitation, non-availability of potable water and poor hygiene conditions. The  
32 present study aimed to better understand the epidemiology of intestinal parasitic  
33 infections in rural areas of forested Cameroon.

34

35 **Methodology:** A cross-sectional survey was conducted in three Health Areas (Ndelele,  
36 Kentzou and Lolo) of the Ndelele Health District (East Region, Cameroon). Information  
37 on socio-demographic characteristics, knowledge, attitudes, and practices regarding  
38 intestinal parasitic infections were collected using a semi-structured questionnaire. Stool  
39 samples were collected and analyzed by the Kato-Katz and formalin-ether concentration  
40 techniques to complement simple direct examination.

41

42 **Principal Findings:** A total of 406 individuals belonging to three main groups (Kako or  
43 Bantu, Baka or Pygmies and Central African Republic refugees) were enrolled in the  
44 study. The overall intestinal parasitic infection rate was 74.9%, including 57.2% cases of  
45 polyparasitism. Fourteen parasite species were identified, 89.1% being intestinal

46 protozoa and 41.8% belonging to helminths. Infections with helminths were associated  
47 with Baka ( $P < 0.0001$ ). Spring water consumption was associated with hookworm  
48 infection (OR = 3.87;  $P = 0.008$ ). Garbage deposited near houses was positively  
49 associated with infection with *Giardia lamblia* (OR = 3.41;  $P = 0.003$ ). Polyparasitism was  
50 positively linked to washing hand without soap before meal (OR= 11.64;  $p= 0.002$ ).

51  
52 **Conclusion/Significance:** Intestinal parasitic infections exhibited high rates in the  
53 Ndelele Health District, especially among indigenous and hard-to-reach populations  
54 (Pygmies). Hygiene measures appear as the main drivers sustaining transmission, and  
55 targeted strategies should be developed to efficiently fight against these debilitating  
56 diseases.

57  
58 **Keywords:** Intestinal parasitic infection, KAP, Ndelele Health District, East Region,  
59 Cameroon.

## 62 **Author summary**

63 Intestinal parasitic infections such as soil transmitted helminthiasis and schistosomiasis,  
64 remain a public health concern in Cameroon. To better understand the epidemiology of  
65 these infections in hard-to-reach populations in rural areas, a cross-sectional study was  
66 carried out in three health areas of Ndelele health District in the Eastern- Cameroon. The  
67 rate of intestinal parasitic infections was high (74.9%) especially in indigenous  
68 populations (Baka-Pygmies) which exhibited high prevalence of soil transmitted helminth

69 infections (83.3%). The study confirmed that the lack of sanitation and poor hygiene  
70 largely contribute to the endemicity of intestinal parasitic infections, particularly among  
71 indigenous populations. Targeted control strategies seem mandatory to reach these  
72 populations and offer them appropriate care to interrupt or reduce the transmission of  
73 these diseases.

74

75

## 76 **Introduction**

77 Intestinal parasitosis are infections caused by intestinal helminths (soil transmitted  
78 helminth or *Schistosoma spp* infections) and protozoa. They are widespread in  
79 developing countries, particularly in the tropics. Absence of sanitation networks, lack of  
80 drinking water, poor public and private hygiene standards, and insufficient health  
81 education exacerbate infection with eggs, larvae and cysts through contact with  
82 contaminated soil, food or water [1-2]. More than 1.5 billion people representing 24% of  
83 the world's population are infected with soil-transmitted helminth infections worldwide [3].  
84 Estimates show that at least 290.8 million people required preventive treatment for  
85 schistosomiasis in 2018, out of which more than 97.2 million have received appropriate  
86 treatment [4]. The main species of soil-transmitted helminths that infect humans are  
87 roundworm (*Ascaris lumbricoides*), whipworm (*Trichuris trichiura*) and hookworms  
88 (*Necator americanus* and *Ancylostoma duodenale*) [5]. The most important intestinal  
89 protozoan infections are amoebiasis (*Entamoeba histolytica*), giardiasis (*Giardia lamblia*),  
90 cryptosporidiosis (*Cryptosporidium sp*), cyclosporiasis (*Cyclospora cayetanensis*) and  
91 isosporiasis (*Isospora belli*) [6]. Children of pre-school and school ages are the most

92 affected by intestinal parasitosis [7-8]. Over 270 million preschool-age children live in  
93 areas where these diseases are intensively transmitted [9]. Helminths negatively  
94 influence the nutritional status of children and adolescents as they inhibit absorption of  
95 nutrients, leading to stunted growth [10]. *Cryptosporidium spp.* is most common in  
96 children with diarrhea, followed by *G. lamblia* and *E. histolytica* [11-12]. The strategy  
97 deployed by the World Health Organization (WHO) to control soil-transmitted helminth  
98 infections is periodic mass administration of Albendazole or Mebendazole to at-risk  
99 populations (pre-school age children, school age children, women of reproductive age,  
100 adults in certain high-risk occupations such as tea-pickers or miners) living in endemic  
101 areas [3-13].

102

103 In Cameroon, intestinal parasitosis remains a public health concern. WHO report on the  
104 estimation of helminthic infections in Cameroon illustrates the unequal distribution of  
105 helminthiasis across the country. Schistosomiasis is highly endemic in the Northern part  
106 of the country. *Ascaris lumbricoides* and *T. trichiura* are widely distributed in the Centre  
107 and South Regions of the country, with the highest prevalence found in the South [14].  
108 Although studies are carried out in some localities [15,16,17], updated and detailed  
109 epidemiological data on intestinal parasitic infections across the country are quite scanty.  
110 This is due not only to limited funding but also to the difficulty to access certain zones due  
111 to very poor road network. This is especially the case of the East Region of Cameroon  
112 which is very landlocked rendering implementation of epidemiological surveys difficult. As  
113 consequence, there is lack of data on the epidemiology of several tropical diseases in this  
114 region, and people usually feel like they are underlooked. This study was therefore

115 conducted to provide unprecedented detailed data on the epidemiology of intestinal  
116 parasitic infections in a hard-to-reach Health District of the East Region of Cameroon.

117

118

## 119 **Methods**

### 120 **Ethical considerations**

121 An ethical clearance (N°1750 CEI-UDo/04/2019/M) was granted by the Institutional  
122 Review Board (IRB) of the University of Douala. Thereafter, administrative authorizations  
123 were delivered by the East Regional Delegate for Public Health, the Ndelele District  
124 Medical Officer and the Heads of the Ndelele and Kentzou Sub-Divisions. Prior to  
125 enrolment, participants were briefed about the study objectives and design. All adult  
126 volunteers who agreed to participate signed a written informed consent form, while formal  
127 consent was obtained from the parent or legal guardian for children under the age of 18.  
128 A unique identifier was used for each participant for anonymity purpose.

129

### 130 **Study area and population**

131 The present study was conducted in the Ndelele Health District located in the Kadey  
132 Division, East Region, Cameroon. This Health District is bordered to the North by the  
133 Batouri Health District, to the South by the Yokadouma Health District, to the West by  
134 the Mbang Health District and to the East by the Bombette and the Kadey river which  
135 border the Central African Republic. In the study area, prevails a Guinean type tropical  
136 climate divided into four seasons: a short rainy season extending from March to June,  
137 a short dry season from July to August, a long rainy season from September to

138 November, and a long dry season from December to March. Vegetation is mainly made  
139 up of dense forest in the Ndelele Health area, and wooded savannah sprinkled with forest  
140 galleries in Kentzou and Lolo Health areas.

141  
142 According to the 2019 census, the population of the Ndelele Health District, including  
143 Central African refugees, was 63,319 inhabitants. This population is organized in several  
144 ethnic groups, of which the most important are the Kako (Bantu), which represents a large  
145 majority of the population, the Baka (Pygmies), an indigenous minority groups mostly  
146 settled in the forest, and an important community of Central African Bororo refugees.  
147 Economic activities of the area are mainly based on agriculture, mining, animal  
148 husbandry, logging, hunting, and trading are also practiced in the Ndelele Health District  
149 [18-19].

150

## 151 **Study design**

152 A household-based cross-sectional survey was carried out in the Ndelele Health District  
153 to investigate the prevalence, intensity of infection and risk factors associated with  
154 intestinal parasitic infections. All volunteers, whatever their age and gender, living in the  
155 Ndelele, Kentzou and Lolo Health areas of the Ndelele Health District, were eligible to  
156 this study. A semi-structured questionnaire (translated in local language by the  
157 community health workers when necessary) was administered to capture their socio-  
158 demographic characteristics and potential factors associated with transmission of  
159 intestinal parasitic infections (WaSH indicators, gender, age groups, ethics groups and  
160 health areas). One part of the questionnaire was only administered to participants over

161 14 years old to know their knowledge about the disease. The WaSH part (hand washing,  
162 water supply, defecation place, barefoot walking) of children under 7 years old was  
163 answered by parents. All participants with seven years or more were responding to the  
164 WaSH part of the questionnaire

165

### 166 **Sample collection and processing**

167 After the interview, a labelled sterile 60mL plastic screw-cap vial was provided to the  
168 participants (or their parents or legal guardian when they were minors), and stool samples  
169 were collected the next day in the morning, between 7 and 8 am. Sample were first  
170 analyzed by direct observation of fresh stool in saline (NaCl 0.9%) to search for worm  
171 eggs, larvae, protozoan trophozoites and cysts. When cyst were present, an iodine wet  
172 mount was performed for further their identification by staining their glycogen and nuclei  
173 [20]. Two concentration techniques were subsequently performed for the diagnosis of  
174 intestinal helminths [21]. Firstly and using the Kato Katz technique thick smears were  
175 prepared on microscope slides using standard 41.7 mg templates. Slides were first  
176 examined under microscope (magnification x100 or x400) within 30 minutes for the  
177 detection of hookworm eggs, then 24 hours later for the identification of other helminth  
178 eggs. When present, eggs were identified and counted, and the results expressed as  
179 number of eggs per gram of stool (epg). Secondly, stool samples were processed by  
180 Formalin-ether concentration technique. Indeed, a suspension of 1g of stool mixed with  
181 10 mL of 10% formalin was prepared and strained through sieve in centrifugation tube;  
182 formalin was added in centrifugation tube to adjust the total volume to 10 mL. After adding  
183 3 mL of ether to the centrifugation tube, the tube was vortexed and then centrifuged for 3



184 min at 500g. From the resulting four layers, the three top layers were discarded, and the  
185 resulting sediment was examined using bright field microscopy for detection of helminths  
186 eggs and intestinal protozoa cysts [22].

187

## 188 **Statistical analysis**

189 Data were entered in a purpose-built Microsoft Office Excel sheet and were exported to  
190 Statistical Package for the Social Sciences (SPSS) version 23 software (SPSS Inc,  
191 Chicago, IL, USA) for analyses. Infection rates were expressed as the number of people  
192 infected by at least one parasite in the study population. For STH specifically, intensities  
193 of infection were classified according to WHO guidelines, as follows: light, moderate and  
194 heavy infections when the epg was 1–1,999, 2,000–3,999 and  $\geq 4,000$  for *hookworm*; 1–  
195 4,999, 5,000–49,999 and  $\geq 50,000$  for *A. lumbricoides*; and 1–999, 1,000–9,999 and  
196  $\geq 10,000$  for *T. trichiura* [23]. Chi-square test was used to assess the difference in infection  
197 rates and proportions of intensities of infection categories according to age groups,  
198 genders, Heath Areas, ethnic groups and WASH indicators (use of latrine, open  
199 defecation and water sources). Logistic regression model was used to investigate the  
200 association between parasite infections and socio-demographic factors (gender, age,  
201 ethnic group and Health Area) as well as WASH indicators adjusted with age, gender,  
202 ethnicity, and health area. Threshold for significance was set at 0.05.

203

204

205

## 206 **Results**

## 207 **Socio-demographics characteristics**

208 A number of 406 participants were included in the study, (166 males and 240 females).  
209 Flighty nine (14.5%) were aged <5 years (preschool-aged children), 98 (24.1%) were  
210 aged 5-14 years (school-aged children) and 249 (61.4%) were aged >14 years  
211 (adolescents and adults). The enrollees were undereducated, with 7.6% of participants  
212 having reached high school, while most of the interviewees have never attended school  
213 (34.2%) or have attended primary school (38.4%) or Koranic schools (19.7%). The  
214 majority of participants (43.6%) lived in Ndelele Health area, while 26.6% and 29.8% were  
215 recruited in Kentzou and Lolo Health areas, respectively. Regarding the ethnic groups,  
216 most of them were Kako (47.8%) and refugees from the Central African Republic (35.5%),  
217 Baka (pygmies; 11.1%) and other ethnic groups (5.7%) being underrepresented as it is  
218 the case in the general population.

219

## 220 **WASH indicators**

221 All the interviewees declared practicing hand washing before meals (100%), though  
222 mostly without soap (96.6%). Although the borehole water was the most used as drinking  
223 water (63.1%), spring water consumption was significantly higher in Ndelele Health area  
224 (50.3%) ( $p < 0.0001$ ). The number of households without latrine (37.1%) and the proportion  
225 of people practicing open defecation (50.3%) were significantly higher in the Ndelele  
226 Health Area. As most of Baka households were without latrines (87.5%), this ethnic group  
227 practiced open defecation more than other ethnic groups (88.9%) ( $< 0.0001$ ) (Table 1).  
228 Barefoot walking (76.3%) and open defecation (45.8%) were practiced mostly by pre-  
229 school aged children ( $p = 0.0001$ ) (Table 2).

230

### 231 **Knowledge of participants with regards with intestinal parasitic infections**

232 Of the 249 participants interviewed, 145 (79.7%) mentioned food as the main mode of  
233 contamination of intestinal parasitic infection, with significantly higher proportion  
234 ( $p=0.0003$ ) in the Kentzou Health Area (97.6%), compared to Ndelele (76.5%) and Lolo  
235 (72.2%) Health Areas. The most frequent clinical sign associated with intestinal  
236 parasitosis by the interviewees were abdominal pain (39.0%), which has been mentioned  
237 by 54.8% in Kentzou, 28.1% in Lolo and 23.5% in Ndelele. The other most known  
238 symptoms were vomiting (31.3%), and diarrhea (11.5%). The Baka ethnic group  
239 (pygmies) exhibited the worst knowledge regarding intestinal parasites.

240

### 241 **Participants' attitude and practice in case of suspected infection**

242 The majority of the enrollees did not use drugs for intestinal parasitic infections (57.1%).  
243 Of the 174 (42.8%) people using medicines for intestinal parasitic infections treatment,  
244 89 (51.1%) were using modern medicine (Mebendazole (36.2%), Metronidazole (10.3%),  
245 and Albendazole (3.4%) whereas 54 (32.8%) used to use traditional medicine such as  
246 bark of trees or leaves of plants. The use of "drugs" was significantly higher ( $p<0.0001$ )  
247 in the Ndélélé Health Area (79.1%) compared to Kentzou (22.2%) and Lolo (6.6%) health  
248 Areas. Baka ethnic group (Pygmies) essentially used traditional drugs in case of  
249 suspected intestinal parasitic infection.

250

### 251 **Prevalence of intestinal parasitic infections**

252 A total of 406 enrollees provided stool samples for diagnostic of intestinal parasitic  
253 infection. The overall prevalence was 74.9%, and this was significantly higher in Ndelele  
254 Health Area (85.3%) compared to the other Health Areas ( $p < 0.0001$ ). Baka ethnic group  
255 was significantly more infected (93.3%) compared to the other ethnic groups ( $p < 0.0001$ ).  
256 Fourteen parasitic species were found including nine protozoa and five helminth species  
257 (Table 3). Intestinal protozoa were found in 89.5% of infected people. The main protozoan  
258 species found were *E. coli* (50.0%), *Blastocystis hominis* (48.0%) and *E. histolytica*  
259 (26.3%). Helminths were found in 41.8% of infected people, and the main species found  
260 were *A. lumbricoides* (31.2%) and *T. trichiura* (11.2%). The distribution of parasitic  
261 species was significantly higher in the Ndelele Health Area (74.4%), followed by Kentzou  
262 (64.3%) and Lolo (50%) (Fig 1). Prevalence of helminth and protozoa infections was  
263 similar between males and females (Fig 2). School-age children were significantly more  
264 infected by *A. lumbricoides* (32.7%;  $p = 0.045$ ) whereas pre-school age children were more  
265 likely infected by *Strongyloides stercoralis* (13.6%;  $p = 0.001$ ). Regarding the ethnic  
266 groups, Baka (Pygmies) were significantly more infected by helminths such as *A.*  
267 *lumbricoides* (83.3%;  $p < 0.0001$ ), *T. trichiura* (68.9%;  $p < 0.0001$ ) and hookworm (26.7%;  
268  $p < 0.0001$ ). Although Protozoan infections were the most common among Central African  
269 refugees (97.4%;  $p = 0.011$ ), prevalence were lower compare to other ethnics. For  
270 example, Kako (autochthones) were most often infected by *E. coli* and *E. histolytica* than  
271 Central African Refugees, respectively [(50.0% vs 18.1%;  $p < 0.0001$ ) and (25.3% vs  
272 11.1%;  $p = 0.012$ )]  
273

274 Polyparasitism was found in 57.2% of enrollees, including infection with two (44.2%),  
275 three (37.9%) and more than four (17.8%) parasites species. Polyparasitism was similar  
276 between genders with a decreasing trend with age. It was significantly low among Central  
277 African refugees (29.9%) compared to Kako (69.5%) and Baka (66.7%) ethnic groups ( $p <$   
278 0.0001). Regarding ethnic groups, polyparasitism was significantly higher in Ndelele  
279 Health Area (65.6%;  $p = 0.012$ ).

280

### 281 **Intensity of helminth infections**

282 Intensity of infection was determined only for helminth infections using Kato-Katz  
283 technique. This parameter varied from 96 to 76,608 epg [median: 2200; interquartile  
284 range (IQR): Q1=1000; Q3=7000] for *A. lumbricoides*, from 96 to 2,520 epg [median: 200;  
285 IQR: Q1=96; Q3=475] for *T. trichiura*, and from 96 to 3,500 epg [median: 148; IQR:  
286 Q1=96; Q3= 325] for hookworm. According to WHO classification, intensity of helminth  
287 infections was light for almost all the enrollees (77.2%) and parasite species, *A.*  
288 *lumbricoides* exhibiting only two cases of heavy infections in the Ndelele Health Area  
289 (Table 3).

290

### 291 **Association between parasitic infections, socio-demographic factors, and WASH** 292 **indicators**

293 A positive association was observed between Baka ethnic group (Pygmies) and helminth  
294 infections, especially *A. lumbricoides* (OR=4.04;  $P < 0.0001$ ) and *T. trichiura* (OR=2.99;  
295  $p = 0.007$ ). Open defecation was positively associated with *T. trichiura* (OR=5.58;  
296  $p < 0.0001$ ). Spring water consumption was positively associated with hookworm infection

297 (OR=3.87; p=0.008) (Table 4). Infection with *G. lamblia* was positively linked to disposal  
298 of garbage near houses (OR=3.41; p= 0.003) and Kentzou Health Area (OR=3.73;  
299 p=0.002). Infection with *E. coli* was positively associated with Lolo Health Area (OR=2.61;  
300 p=0.011) and open defecation (OR=2.16; p=0.001) (Table 4).

301

302

## 303 Discussion

304 The present study aimed to understand the epidemiology of intestinal parasitic infections  
305 in the Ndelele, Kentzou and Lolo Health Areas of the Ndelele Health District. Overall,  
306 74.9% of participants were infected by at least one intestinal parasite species, which is  
307 similar to the infection rate (88.2%) in the neighboring areas of Central African Republic  
308 [24]. By contrast this prevalence was very high compared to those obtained by Mbuh *et*  
309 *al.* (31.0%) and Denecho *et al.* (59.1%) in the South-West Region of Cameroon [25-26]  
310 and Saoting *et al.* (30.0%) in the North Region of Cameroon [27]. This very high infection  
311 prevalence can be explained by the poor hygiene and sanitation, and reduced access to  
312 appropriate treatments in these landlocked areas. Indeed, a KAP survey conducted as  
313 part of this study revealed poor knowledge of interviewees about parasitic infection  
314 transmission. Those who identified food as the main mode of contamination were making  
315 reference to the consumption of sweet fruits (68.1%) such as mango or banana,  
316 contaminated food (12.9%) or water (10.7%). In addition, the KAP survey also revealed  
317 poor practice of hand hygiene as 96.6% of enrollees was practicing hand washing without  
318 soap before each meal. Also, due to absence of latrines in most of the households  
319 (20.4%, an important proportion (32.7%) of the population used to practice open

320 defecation that can contribute to the persistence of transmission. It is also worth to  
321 mention that most of the enrollees did not use appropriate treatment (drugs known to be  
322 effective) against intestinal parasitic infections, likely because of the difficulty to access  
323 to modern medicines, and when treatment campaigns are organized, they are only  
324 restricted to at-risk groups. Indeed, the use of traditional medicine can represent a viable  
325 option but the fact that they have limited knowledge of clinical signs of different infections  
326 can jeopardize the efficacy of traditional medicines.

327  
328 Likewise, infection by single parasite species, polyparasitism was also important (57.2%)  
329 in the framework of this study conducted in rural communities compared to relatively low  
330 rates (2.1%-14.7%) of polyparasitism found in urban areas such as in Douala, the  
331 Cameroon economic city capital [28-29]. These observations confirm the results of  
332 previous studies demonstrating that polyparasitism is more important in rural areas  
333 compared to urban settings [28, 30, 31], likely because of poor adherence to WASH.  
334 Indeed, a positive association was is often reported between poor practice of hand  
335 washing and polyparasitism;, showing that people who never wash their hands with soap  
336 before each meal are about 12 times more at risk of intestinal parasitic infections than  
337 their counterparts who always wash their hands before meals.

338  
339 As part of the present study, two vulnerable/special populations were enrolled, namely  
340 the Baka (Pygmies) and the Central African Refugees. Baka's are qualified as  
341 "indigenous people" because of their culture which is very different of that of the  
342 "dominant" ethnic group (Kako) [32]. Although these two groups are vulnerable, their rate

343 of intestinal parasitic infection were statistically different, the Baka being heavily infested  
344 (93.3% vs 53.5%), and highly polyparasitized (66.7% vs 29.9%). Unlike refugees, Baka  
345 (Pygmies) live in the forest in extreme poverty conditions. Indeed, the Baka ethnic group  
346 exhibited the worst results for WASH indicators while most of their households (87.5%)  
347 do not have latrines. As consequence 88.9% of Baka participant practiced open  
348 defecation known as a facilitating factor for the dissemination of parasite stages (eggs  
349 and cysts) responsible of human infections. This situation is exacerbated by the fact that  
350 most may not wash their hands before eating, although they have declared to do so.  
351 Previous studies conducted among “indigenous communities” demonstrated that they are  
352 most often affected by helminth infections such as *A. lumbricoides*, *T. trichiura* and  
353 hookworms [33, 34, 35] as it was found in this study. Contrarily to Baka, Central African  
354 refugees found in the Ndelele Health District are, for the vast majority were placed under  
355 the protection of the High Commissioner for Refugees benefiting from many facilities from  
356 Non-Governmental Organizations, including UNICEF, PRO-ACT Project, *Premiere*  
357 *Urgence Internationale*, Care, Red Cross, *Solidarités Internationales*. Central African  
358 refugees therefore benefit from donations such as latrines and boreholes construction  
359 [36- 37], permanent education on environmental and personal hygiene to improve their  
360 living conditions, and appropriate treatments. This can explain the fact that the infection  
361 rates of the targeted parasitic infections are quite low among this special population.

362

363

364

365



366

## 367 **Conclusion**

368 The present study provides useful data on infection rates and risk factors associated with  
369 intestinal parasitic infection in the Ndelele Health District. The results highlighted  
370 exceptionally high rates of infections in this landlocked. Lack of sanitation and poor  
371 hygiene can largely contribute to the endemicity of intestinal parasitic infections,  
372 especially among indigenous and hard-to-reach populations (Pygmies). Targeted and  
373 complementary control strategies appear compulsory to reach these populations and  
374 offer appropriate care to interrupt or at least reduce the transmission of these debilitating  
375 diseases.

376

377

## 378 **Acknowledgements**

379 The authors are thankful to all the population of the Ndelele Health District for their  
380 hospitality and their participation. We are grateful to all those who contributed in the  
381 realization of this study.

382

383

## 384 **References**

385 [1] Campbell SJ, Biritwum NK, Woods G, Velleman Y, Fleming F, Stothard JR. Tailoring  
386 Water, Sanitation, and Hygiene (WASH) Targets for Soil-Transmitted Helminthiasis and

- 387 Schistosomiasis Control. Trends Parasitol. 2018 Jan;34(1):53-63. doi:  
388 10.1016/j.pt.2017.09.004. Epub 2017 Oct 18. PMID: 29055522.
- 389 [2] Crompton, David W. T & Savioli, L. (1993). Intestinal parasitic infections and  
390 urbanization / D. W. T. Crompton & L. Savioli. Bulletin of the World Health Organization  
391 1993 ; 71(1) : 1-7 <https://apps.who.int/iris/handle/10665/49956>
- 392 [3] World Health Organisation. Soil Transmitted helminths infections. 2 March 2019.  
393 Online: [https://www.who.int/news-room/fact-sheets/detail/soil-transmitted-helminth-](https://www.who.int/news-room/fact-sheets/detail/soil-transmitted-helminth-infections)  
394 [infections](https://www.who.int/news-room/fact-sheets/detail/soil-transmitted-helminth-infections)
- 395 [4] World Health Organization Global Health Estimates 2016: Deaths by Cause, Age, Sex,  
396 by Country and by Region,2000-2016. Geneva, online:  
397 [https://www.who.int/healthinfo/global\\_burden\\_disease/estimates/en/](https://www.who.int/healthinfo/global_burden_disease/estimates/en/)
- 398 [5] Centers for Disease Control and Prevention. Parasites- Soil Transmitted- Helminths.  
399 January 10, 2013. Online: <https://www.cdc.gov/parasites/sth/index.html>
- 400 [6] Suna Balkan, Pierre Barel, Marie-Claude Bottineau, Philippa Boule. Médecins Sans  
401 Frontières. Online:[https://medicalguidelines.msf.org/viewport/CG/english/intestinal-](https://medicalguidelines.msf.org/viewport/CG/english/intestinal-protozoan-infections-parasitic-diarrhoea-16689774.html#)  
402 [protozoan-infections-parasitic-diarrhoea-16689774.html#](https://medicalguidelines.msf.org/viewport/CG/english/intestinal-protozoan-infections-parasitic-diarrhoea-16689774.html#)
- 403 [7] Ibrahim Mohammed, Endalkachew Nibret, Mulugeta Kibret, Bayeh Abera, Melaku  
404 Adal. Prevalence of diarrhea causing protozoan infections and associated risk factors in  
405 diarrheic under five children in Bahir Dar town, northwest Ethiopia: pediatric clinic based  
406 study. Ethiopian Journal of Science and Technology. (2016) doi: 10.4314/ejst.v9i1.2

- 407 [8] WHO Expert Committee on the Control of Schistosomiasis (2001 : Geneva,  
408 Switzerland) & World Health Organization. (2002). Prevention and control of  
409 schistosomiasis and soil-transmitted helminthiasis : report of a WHO expert  
410 committee. World Health Organization. <https://apps.who.int/iris/handle/10665/42588>
- 411 [9] World Health Organization. Integrating neglected tropical diseases into global health  
412 and development: fourth WHO report on neglected tropical diseases. World Health  
413 Organization (2017). . <https://apps.who.int/iris/handle/10665/255011>. License: CC BY-  
414 NC-SA 3.0 IGO
- 415 [10] Ross AG, Papier K, Luceres-Catubig R, Chau TN, Inobaya MT, Ng SK. Poverty,  
416 Dietary Intake, Intestinal Parasites, and Nutritional Status among School-Age Children in  
417 the Rural Philippines. *Trop Med Infect Dis*. 2017;2(4):49. Published 2017 Sep 21.  
418 doi:10.3390/tropicalmed2040049
- 419 [11 Bauhofer AFL, Cossa-Moiane I, Marques S, Guimarães EL, Munlela B, et al.  
420 (2020) Intestinal protozoan infections among children 0-168 months with diarrhea in  
421 Mozambique: June 2014 - January 2018. *PLOS Neglected Tropical Diseases* 14(4):  
422 e0008195. <https://doi.org/10.1371/journal.pntd.0008195>]
- 423 [12] Tellevik MG, Moyo SJ, Blomberg B, Hjøllø T, Maselle SY, Langeland N et al.  
424 Prevalence of *Cryptosporidium parvum/hominis*, *Entamoeba histolytica* and *Giardia*  
425 *lamblia* among Young Children with and without Diarrhea in Dar es Salaam, Tanzania.  
426 *PLoS Negl Trop Dis*. 2015 Oct. doi: 10.1371/journal.pntd.0004125.

- 427 [13] AÅ sbjoÈrnsdoÅttir KH, Ajjampur SSR, Anderson RM, Bailey R, Gardiner I, Halliday  
428 KE, et al. (2018) Assessing the feasibility of interrupting the transmission of soil-  
429 transmitted helminthes through mass drug administration: The DeWorm3 cluster  
430 randomized trial protocol. PLoS Negl Trop Dis 12(1): e0006166. [https://doi.org/10.1371/  
431 journal.pntd.0006166](https://doi.org/10.1371/journal.pntd.0006166)
- 432 [14] Simon Brooker, Christl A. Donnelly, Helen L. Guyatt. Estimating the number of  
433 helminthic infections in the republic of Cameroon on data on infection prevalence in  
434 school children. Bulletin of World Health Organisation, Febuary 2000,  
435 DOI: [10.1590/S0042-96862000001200014](https://doi.org/10.1590/S0042-96862000001200014)
- 436 [15] Esther Nana Dankoni et L. A Tchuem Tchuente. Epidémiologie de la schistosomiase  
437 et des geohelminthiases dans l'arrondissement de kekem (Ouest-Cameroun).  
438 International Journal of innovation and applied studies ISSN 2028-9324 VOL. 8 num 4  
439 Oct. 2014, pp. 1782-1790. doi=10.1.1.672.872
- 440 [16] L. Nkengazong, F. Njiokoum, S. Wanji, F. Teukeng, P. Enyong, T. Asonganyi.  
441 Prevalence of soil transmitted and impact of Albendazole on parasitic indices in Kotto  
442 Barombi and Marumba II villages (South-west Cameroon). Vol. 4 No. 3 (2010).\_ doi:  
443 [10.5897/ajest09.205](https://doi.org/10.5897/ajest09.205).
- 444 [17] Tchuem Tchuente, Behnke S. M, Gilbert F. S, V. R. Southgate, J. Vercruysse.  
445 Polyparasitism with Schistosoma haematobium and soil transmitted helminths infections  
446 among school children in Loum, Cameroon. Trop. Med. Int. H., 2003, 8(11), 975-986.  
447 <https://doi.org/10.1046/j.1360-2276.2003.01120.x>

- 448 [18] Communes et villes unies du Cameroun: United council and cities of Cameroon.  
449 Online:[http://cvuc.cm/national/index.php/fr/carte-communale/region-de-lest/122-](http://cvuc.cm/national/index.php/fr/carte-communale/region-de-lest/122-association/carte-administrative/est/kadey/487-ndelele)  
450 [association/carte-administrative/est/kadey/487-ndelele](http://cvuc.cm/national/index.php/fr/carte-communale/region-de-lest/122-association/carte-administrative/est/kadey/487-ndelele)
- 451 [19] Communes et villes unies du Cameroun: United council and cities of Cameroon.  
452 Online:[http://cvuc.cm/national/index.php/fr/carte-communale/region-de-lest/122-](http://cvuc.cm/national/index.php/fr/carte-communale/region-de-lest/122-association/carte-administrative/est/kadey/485-kentzou)  
453 [association/carte-administrative/est/kadey/485-kentzou](http://cvuc.cm/national/index.php/fr/carte-communale/region-de-lest/122-association/carte-administrative/est/kadey/485-kentzou)
- 454 [20] World Health Organization. Basic laboratory methods in medical parasitology.  
455 WHO(1991) . <https://apps.who.int/iris/handle/10665/40793>
- 456 [21] World Health Organization. Planches pour le diagnostic des parasites  
457 intestinaux. Genève: Organisation mondiale de la  
458 Santé(1994). <https://apps.who.int/iris/handle/10665/37327>
- 459 [22] J. Utzinger, Botero-Kleiven, S. Castelli, P.L. Chiodini, H. Edwards, N. Köhler et al.  
460 Microscopic diagnosis of sodium acetate-acetic acid-formalin-fixed stool samples for  
461 helminths and intestinal protozoa: a comparison among European reference laboratories.  
462 Clinical Microbiology Infectious Diseases. (2010). 16, 267–273. doi: 10.1111/j.1469-  
463 0691.2009.02782.x
- 464 [23] E.C. Strunz, David G. Addiss, Meredith E. Stocks, Stephanie Ogden, Jürg Utzinger,  
465 Matthew et al. Water, sanitation, hygiene, and soil-transmitted helminth infection: a  
466 systematic review and meta-analysis. PLoS Med. 2014 Mar 25;11(3):e1001620.  
467 doi:10.1371/journal.pmed.1001620.

468 [24] G. Tékpa, V. Fikouma, E. Gbangba-Ngaï, B.O. Bogning Mejozem, S. Ningatouloum  
469 Nazita, B. Koffi, Epidemiological and clinical profile of intestinal parasitosis of children in  
470 rural areas in Central African Republic, Archives de Pédiatrie, Volume 26, Issue  
471 1, 2019, Pages 34-37, <https://doi.org/10.1016/j.arcped.2018.11.006>.

472 [25] J.V. Mbuh, N.H. Ntonifor and J. Ojong. The epidemiology of soil-transmitted helminth  
473 and protozoan infections in south-west Cameroon. Journal of helminthology Volume 86,  
474 Issue 1 March 2012, pp. 30-37. doi: <https://doi.org/10.1017/S0022149X1000091X>

475 [26] L. Ndenecho, K. J.N. Ndamukong, M. M. Matute. Soil transmitted nematodes in  
476 Children in Buea Health district of Cameroon. East African Medical Journal: 2002 79(8):  
477 442-445). doi: 10.4314/eamj.v79i8.8832.

478 [27] Saotoing, R. Djonyang, D. D. Dereng et al. Enquête épidémiologique sur les  
479 parasitoses urinaires et intestinales chez les élèves des écoles primaires de  
480 l'arrondissement de Maga, Extrême-Nord Cameroun. African Journal Online (2016). doi:  
481 10.4314/ijbcs.v10i1.26.

482 [28] L. G. Lehman, L. Koujip, C.F. Bilong Bilong. Diagnostic des parasitoses intestinales  
483 à l'aide de la microscopie à fluorescence. Medecine d'Afrique noire. Juillet 2012. Online  
484 : [Diagnostic des parasitoses intestinales à l'aide de la microscopie à fluorescence \(ured-  
485 douala.com\)](http://www.douala.com)

486 [29] Thomas KUETE, Fomefret Loic, Sorel YEMELI, Emmanuel ESSONO MVOA,  
487 Therese NKOA, Roger M. Somo, A. Same Ekobo. Prevalence and Risk Factors of  
488 Intestinal Helminth and Protozoa Infections in an Urban Setting of Cameroon: the Case

489 of Douala. *American Journal of Epidemiology and Infectious Disease* (2015). doi:  
490 10.12691/ajeid-3-2-4.

491 [30] Al-Delaimy AK, Al-Mekhlafi HM, Nasr NA, Sady H, Atroosh WM, Mohammed Nashiry,  
492 Tengku S. Anuar et al. Epidemiology of Intestinal Polyparasitism among Orang Asli  
493 School Children in Rural Malaysia. *PLoS Negl Trop Dis* (2014)  
494 doi:10.1371/journal.pntd.0003074.

495 [31] Opara KN, Udoidung NI, Opara DC, Okon OE, Edosomwan EU, Udoh AJ. The  
496 Impact of Intestinal Parasitic Infections on the Nutritional Status of Rural and Urban  
497 School-Aged Children in Nigeria. *Int J MCH AIDS*. (2012) doi:10.21106/ijma.8.

498 [32] Supplementary report submitted in connection with Cameroon's second periodic  
499 report. Indigenous peoples' rights in Cameroon. May 2010. Online:  
500 [https://www.forestpeoples.org/sites/fpp/files/publication/2010/08/cameroonachprsubmis](https://www.forestpeoples.org/sites/fpp/files/publication/2010/08/cameroonachprsubmissionmay10eng.pdf)  
501 [sionmay10eng.pdf](https://www.forestpeoples.org/sites/fpp/files/publication/2010/08/cameroonachprsubmis)

502 [33] Chin, Y.T., Lim, Y.A.L., Chong, C.W. *et al.* Prevalence and risk factors of intestinal  
503 parasitism among two indigenous sub-ethnic groups in Peninsular Malaysia. *Infect Dis*  
504 *Poverty* (2016). <https://doi.org/10.1186/s40249-016-0168-z>.

505 [34] Rajoo Y, Ambu S, Lim YAL, Rajoo K, Tey SC, Lu CW, et al. Neglected Intestinal  
506 Parasites, Malnutrition and Associated Key Factors: A Population Based Cross-Sectional  
507 Study among Indigenous Communities in Sarawak, Malaysia. *PLoS ONE* (2017)  
508 <https://doi.org/10.1371/journal.pone.0170174>.

509 [35] Carla Scolari, Carlo Torti, Anna Beltrame, Alberto Matteelli, Francesco Castelli,  
510 Maurizio Gulletta et al. Prevalence and distribution of soil-transmitted helminth (STH)  
511 infections in urban and indigenous schoolchildren in Ortigueira, State of Paraná, Brasil:  
512 implications for control. Tropical medicine and international health. December 2001.  
513 <https://doi.org/10.1046/j.1365-3156.2000.00549.x>

514 [36] Rapport inter-agences sur la situation des refugiees Centrafricains. Cameroun. 13-  
515 19 Octobre 2014. Online : <https://data2.unhcr.org/en/documents/download/32746>

516 [37] Rapport inter-agences sur la situation des refugiees Centrafricains. Cameroun. 1-31  
517 Mars 2016. Online:[https://reliefweb.int/report/cameroon/cameroun-rapport-inter-](https://reliefweb.int/report/cameroon/cameroun-rapport-inter-agences-sur-la-situation-des-r-fugi-s-centrafricains-1-31-0)  
518 [agences-sur-la-situation-des-r-fugi-s-centrafricains-1-31-0](https://reliefweb.int/report/cameroon/cameroun-rapport-inter-agences-sur-la-situation-des-r-fugi-s-centrafricains-1-31-0)

519

520

## 521 **Figure legends**

522 **Fig. 1.** Spatial distribution of parasitic infections in Ndelele, Kentzou and Lolo health areas  
523 of Ndelele Health District.

524

525 **Fig. 2.** Frequency of parasitic infections according to gender.



526 **Tables**

527 **Table 1: WASH indicators according to Health area and ethnic groups**

|                                                           | Health area |      |         |      |      |      | Ethnic groups |      |      |      |              |      |               |      |
|-----------------------------------------------------------|-------------|------|---------|------|------|------|---------------|------|------|------|--------------|------|---------------|------|
|                                                           | Ndelele     |      | Kentzou |      | Lolo |      | Kako          |      | Baka |      | CAR refugees |      | Other ethnics |      |
|                                                           | n           | %    | n       | %    | n    | %    | n             | %    | n    | %    | n            | %    | n             | %    |
| <b>Latrine owning*</b>                                    |             |      |         |      |      |      |               |      |      |      |              |      |               |      |
| Yes                                                       | 56          | 61.5 | 47      | 92.2 | 70   | 95.8 | 74            | 78.7 | 3    | 12.5 | 85           | 98.8 | 11            | 100  |
| No                                                        | 35          | 38.5 | 4       | 7.8  | 3    | 4.2  | 20            | 21.3 | 21   | 87.5 | 1            | 1.2  | 0             | 0.0  |
| <b>Frequency of hand washing with soap*</b>               |             |      |         |      |      |      |               |      |      |      |              |      |               |      |
| Always                                                    | 3           | 1.7  | 5       | 4.6  | 11   | 9.1  | 3             | 1.5  | 0    | 0.0  | 15           | 10.4 | 0             | 0.0  |
| Sometimes                                                 | 71          | 40.1 | 57      | 52.7 | 45   | 37.2 | 110           | 56.7 | 11   | 24.4 | 44           | 30.6 | 8             | 34.8 |
| Often                                                     | 12          | 6.7  | 35      | 34.4 | 52   | 43.0 | 10            | 5.2  | 0    | 0.0  | 84           | 58.3 | 5             | 21.7 |
| Never                                                     | 91          | 51.4 | 12      | 11.1 | 13   | 10.7 | 71            | 36.6 | 34   | 75.6 | 1            | 0.7  | 10            | 43.5 |
| <b>Barefoot walking*</b>                                  |             |      |         |      |      |      |               |      |      |      |              |      |               |      |
| Always                                                    | 4           | 2.3  | 0       | 0    | 2    | 1.7  | 2             | 1.0  | 3    | 6.7  | 1            | 0.7  | 0             | 0.0  |
| Sometimes                                                 | 83          | 44.9 | 49      | 45.4 | 50   | 41.3 | 87            | 44.8 | 19   | 42.2 | 68           | 47.2 | 8             | 34.8 |
| Often                                                     | 78          | 44.1 | 39      | 36.1 | 17   | 14.0 | 99            | 51.0 | 22   | 48.9 | 6            | 4.2  | 7             | 30.4 |
| Never                                                     | 12          | 6.8  | 20      | 18.5 | 52   | 43.0 | 6             | 3.1  | 1    | 2.2  | 69           | 47.9 | 8             | 34.8 |
| <b>Water sources*</b>                                     |             |      |         |      |      |      |               |      |      |      |              |      |               |      |
| Spring water                                              | 89          | 50.3 | 51      | 47.2 | 1    | 0.8  | 72            | 37.1 | 45   | 100  | 17           | 11.8 | 7             | 30.4 |
| Well water                                                | 9           | 5.1  | 0       | 0.0  | 0    | 0.0  | 5             | 2.6  | 0    | 0.0  | 4            | 2.8  | 0             | 0.0  |
| Borehole water                                            | 79          | 44.6 | 57      | 52.8 | 120  | 99.2 | 117           | 60.3 | 0    | 0.0  | 123          | 85.4 | 16            | 69.6 |
| <b>Defecation place*</b>                                  |             |      |         |      |      |      |               |      |      |      |              |      |               |      |
| Toilet                                                    | 89          | 50.3 | 78      | 72.2 | 106  | 87.6 | 107           | 55.2 | 3    | 6.7  | 142          | 98.6 | 21            | 91.3 |
| Open defecation                                           | 72          | 40.7 | 17      | 15.7 | 11   | 9.1  | 58            | 29.9 | 40   | 88.9 | 1            | 0.7  | 1             | 4.3  |
| Toilet and open defecation                                | 16          | 9.0  | 13      | 12.0 | 4    | 3.3  | 29            | 14.9 | 3    | 4.4  | 1            | 0.7  | 1             | 4.3  |
| <b>Disposal of garbage in close proximity to houses *</b> |             |      |         |      |      |      |               |      |      |      |              |      |               |      |
| Yes                                                       | 98          | 55.4 | 24      | 22.2 | 17   | 14.0 | 83            | 42.8 | 39   | 86.7 | 137          | 4.9  | 10            | 43.5 |
| No                                                        | 79          | 44.6 | 84      | 77.8 | 104  | 86.0 | 111           | 57.2 | 6    | 13.3 | 7            | 95.1 | 13            | 56.5 |

528 *CAR: Central African Republic; \*p-value <0.0001*

529

530

531

532

533

534 **Table 2: WASH indicators according to gender and age groups**

|                                                         | Gender                 |                          | Age groups          |                       |                        |                        |                        |                        |                      |
|---------------------------------------------------------|------------------------|--------------------------|---------------------|-----------------------|------------------------|------------------------|------------------------|------------------------|----------------------|
|                                                         | Male<br>n=166<br>n (%) | Female<br>n=240<br>n (%) | <5<br>n=59<br>n (%) | 5-14<br>n=98<br>n (%) | 15-24<br>n=66<br>n (%) | 25-34<br>n=51<br>n (%) | 35-44<br>n=59<br>n (%) | 45-54<br>n=32<br>n (%) | 55+<br>n=41<br>n (%) |
| <b>Frequency of hand washing with soap *</b>            |                        |                          |                     |                       |                        |                        |                        |                        |                      |
| Always                                                  | 12(7.2)                | 6(2.5)                   | 0(0.0)              | 0(0.0)                | 3(4.5)                 | 5(9.8)                 | 6(10.2)                | 3(9.4)                 | 1(2.4)               |
| Sometimes                                               | 74(44.6)               | 99(41.3)                 | 25(42.4)            | 59(60.2)              | 25(37.9)               | 21(37.9)               | 19(32.2)               | 9(28.1)                | 15(36.6)             |
| Often                                                   | 33(19.9)               | 66(27.5)                 | 7(11.9)             | 8(8.2)                | 20(30.3)               | 16(31.4)               | 16(27.1)               | 14(43.8)               | 18(43.9)             |
| Never                                                   | 47(28.3)               | 69(28.8)                 | 27(45.8)            | 31(31.6)              | 18(27.3)               | 9(17.6)                | 18(30.5)               | 6(18.8)                | 7(17.1)              |
| <b>Barefoot walking*</b>                                |                        |                          |                     |                       |                        |                        |                        |                        |                      |
| Always                                                  | 1(0.6)                 | 5(2.1)                   | 0(0.0)              | 2(2.0)                | 0(0.0)                 | 0(0.0)                 | 2(3.4)                 | 1(3.1)                 | 1(2.1)               |
| Sometimes                                               | 70(42.2)               | 112(46.7)                | 12(20.3)            | 47(48.0)              | 42(63.6)               | 24(47.1)               | 26(44.1)               | 14(43.8)               | 17(41.5)             |
| Often                                                   | 64(38.6)               | 70(29.2)                 | 45(76.3)            | 45(45.9)              | 12(18.2)               | 6(11.8)                | 14(23.7)               | 5(15.6)                | 7(17.1)              |
| Never                                                   | 31(18.7)               | 53(22.1)                 | 2(3.4)              | 4(4.1)                | 12(18.2)               | 21(41.2)               | 17(28.8)               | 12(37.5)               | 16(39.0)             |
| <b>Water sources</b>                                    |                        |                          |                     |                       |                        |                        |                        |                        |                      |
| Spring water                                            | 60(36.1)               | 61(33.8)                 | 23(39.0)            | 27(27.6)              | 28(42.4)               | 16(31.4)               | 23(39.0)               | 12(37.5)               | 12(29.3)             |
| Well water                                              | 4(2.4)                 | 5(2.1)                   | 2(3.4)              | 3(3.1)                | 0(0.0)                 | 1(2.0)                 | 1(1.7)                 | 0(0.0)                 | 2(4.9)               |
| Borehole water                                          | 102(61.4)              | 154(64.2)                | 34(57.6)            | 68(69.4)              | 38(57.6)               | 34(66.7)               | 35(59.3)               | 20(62.5)               | 27(65.9)             |
| <b>Defecation place*</b>                                |                        |                          |                     |                       |                        |                        |                        |                        |                      |
| Toilet                                                  | 108(65.1)              | 165(68.8)                | 22(37.3)            | 53(54.1)              | 51(77.3)               | 41(80.4)               | 43(72.9)               | 27(84.4)               | 36(87.8)             |
| Open defecation                                         | 44(26.5)               | 56(23.3)                 | 27(45.8)            | 27(27.6)              | 12(18.2)               | 8(15.7)                | 16(27.1)               | 5(15.6)                | 5(12.2)              |
| Toilet and open defecation                              | 14(8.4)                | 19(7.9)                  | 10(16.9)            | 18(18.4)              | 3(4.5)                 | 2(3.9)                 | 0(0.0)                 | 0(0.0)                 | 0(0.0)               |
| <b>Disposal of garbage in close proximity to houses</b> |                        |                          |                     |                       |                        |                        |                        |                        |                      |
| Yes                                                     | 65(39.2)               | 74(30.8)                 | 22(37.3)            | 37(37.8)              | 24(36.4)               | 14(27.5)               | 22(37.3)               | 9(28.1)                | 11(26.8)             |
| No                                                      | 101(60.8)              | 166(69.2)                | 37(62.7)            | 61(62.2)              | 42(63.6)               | 37(72.5)               | 37(62.7)               | 23(71.9)               | 30(73.2)             |

535 \* $p < 0.0001$

536

537

538 **Table 3: Parasitic infections in ethnics groups**

| Parasitic species                | Ethnic groups |        |             |        |                                  |      |                      |      |
|----------------------------------|---------------|--------|-------------|--------|----------------------------------|------|----------------------|------|
|                                  | Kako (n=194)  |        | Baka (n=45) |        | Central African refugees (n=144) |      | Other ethnics (n=23) |      |
|                                  | Infected      | %      | Infected    | %      | Infected                         | %    | Infected             | %    |
| <b>Helminths</b>                 |               |        |             |        |                                  |      |                      |      |
| <i>Ascaris lumbricoides</i>      | 54            | 27.8   | 31          | 68.9** | 4                                | 2.8  | 6                    | 26.1 |
| <i>Trichuris trichiura</i>       | 21            | 10.8   | 12          | 26.7** | 0                                | 0.0  | 1                    | 4.3  |
| Hookworm                         | 15            | 7.7**  | 2           | 4.4    | 1                                | 0.7  | 0                    | 0.0  |
| <i>Strongyloides stercoralis</i> | 10            | 5.2    | 4           | 8.9    | 0                                | 0.0  | 0                    | 0.0  |
| <i>Enterobius vermicularis</i>   | 1             | 0.5    | 0           | 0.0    | 0                                | 0.0  | 0                    | 0.0  |
| <b>Protozoa</b>                  |               |        |             |        |                                  |      |                      |      |
| <i>Entamoeba Coli</i>            | 97            | 50.0*  | 19          | 42.2   | 27                               | 18.8 | 9                    | 39.1 |
| <i>Entamoeba histolytica</i>     | 49            | 25.3** | 10          | 22.2   | 16                               | 11.1 | 5                    | 21.1 |
| <i>Entamoeba hartmanni</i>       | 5             | 2.6    | 4*          | 8.9    | 0                                | 0.0  | 0                    | 0.0  |
| <i>Endolimax nana</i>            | 11            | 5.7    | 1           | 2.2    | 2                                | 1.4  | 0                    | 0.0  |
| <i>Iodamoeba butshlii</i>        | 21            | 10.8*  | 2           | 4.4    | 1                                | 0.7  | 0                    | 0.0  |
| <i>Giardia lamblia</i>           | 16            | 8.2    | 2           | 4.4    | 8                                | 5.6  | 3                    | 13.0 |
| <i>Balantidium coli</i>          | 1             | 0.5    | 0           | 0.0    | 0                                | 0.0  | 0                    | 0.0  |
| <i>Isospora belli</i>            | 1             | 0.5    | 0           | 0.0    | 1                                | 0.7  | 0                    | 0.0  |
| <i>Blastocystis hominis</i>      | 80            | 41.2   | 18          | 40.0   | 42                               | 29.2 | 6                    | 26.1 |

539 \* $p < 0.05$ ; \*\* $p < 0.0001$ 

540

541

542 **Table 4: Intensity of helminth infections**

|                      | <i>Ascaris lumbricoides</i> |              |           | <i>Trichuris trichiura</i> |              |           | Hookworm  |              |           |
|----------------------|-----------------------------|--------------|-----------|----------------------------|--------------|-----------|-----------|--------------|-----------|
|                      | Light (%)                   | Moderate (%) | Heavy (%) | Light (%)                  | Moderate (%) | Heavy (%) | Light (%) | Moderate (%) | Heavy (%) |
| <b>Gender</b>        |                             |              |           |                            |              |           |           |              |           |
| Male                 | 23(60.5)                    | 15(39.5)     | 0(0.0)    | 11(91.7)                   | 1(8.3)       | 0(0.0)    | 6(100)    | 0(0.0)       | 0(0.0)    |
| Female               | 43(75.4)                    | 12(21.1)     | 2(3.5)    | 18(90.0)                   | 2(10.0)      | 0(0.0)    | 11(91.7)  | 1(8.3)       | 0(0.0)    |
| <b>Age groups</b>    |                             |              |           |                            |              |           |           |              |           |
| <5                   | 9(60.0)                     | 5(33.3)      | 1(6.7)    | 5(83.3)                    | 1(16.7)      | 0(0.0)    | 3(75.0)   | 1(25.0)      | 0(0.0)    |
| 5-14                 | 18(56.3)                    | 14(43.8)     | 0(0.0)    | 11(91.7)                   | 1(8.3)       | 0(0.0)    | 5(100)    | 0(0.0)       | 0(0.0)    |
| 15-24                | 16(84.2)                    | 2(10.5)      | 1(5.3)    | 4(80.0)                    | 1(20.0)      | 0(0.0)    | 0(0.0)    | 0(0.0)       | 0(0.0)    |
| 25-34                | 7(100)                      | 0(0.0)       | 0(0.0)    | 2(100)                     | 0(0.0)       | 0(0.0)    | 3(100)    | 0(0.0)       | 0(0.0)    |
| 35-44                | 5(62.5)                     | 3(37.5)      | 0(0.0)    | 2(100)                     | 0(0.0)       | 0(0.0)    | 2(100)    | 0(0.0)       | 0(0.0)    |
| 45-54                | 4(80.0)                     | 1(20.0)      | 0(0.0)    | 1(100)                     | 0(0.0)       | 0(0.0)    | 2(100)    | 0(0.0)       | 0(0.0)    |
| 55+                  | 7(77.8)                     | 2(22.2)      | 0(0.0)    | 2(100)                     | 0(0.0)       | 0(0.0)    | 2(100)    | 0(0.0)       | 0(0.0)    |
| <b>Health area</b>   |                             |              |           |                            |              |           |           |              |           |
| Ndelele              | 47 (63.5)                   | 25(33.8)     | 2 (2.7)   | 23 (95.8)                  | 1 (4.2)      | 0 (0.0)   | 9 (90.0)  | 1 (10.0)     | 0 (0.0)   |
| Kentzou              | 11 (100)                    | 0 (0.0)      | 0 (0.0)   | 6 (75.0)                   | 2 (25.0)     | 0 (0.0)   | 6 (100)   | 0 (0.0)      | 0 (0.0)   |
| Lolo                 | 8 (80)                      | 2 (20.0)     | 0 (0.0)   | 0 (0.0)                    | 0 (0.0)      | 0 (0.0)   | 2 (100)   | 0 (0.0)      | 0 (0.0)   |
| <b>Ethnic groups</b> |                             |              |           |                            |              |           |           |              |           |
| Kako                 | 40(74.1)                    | 13(24.1)     | 1(1.9)    | 16(84.2)                   | 3(15.8)      | 0(0.0)    | 14(93.3)  | 1(6.7)       | 0 (0.0)   |
| Baka                 | 19(61.3)                    | 11(35.5)     | 1(3.2)    | 12(100)                    | 0(0.0)       | 0(0.0)    | 2(100)    | 0(0.0)       | 0(0.0)    |
| CAR refugees         | 4(100)                      | 0(0.0)       | 0(0.0)    | 0(0.0)                     | 0(0.0)       | 0(0.0)    | 1(100)    | 0(0.0)       | 0(0.0)    |
| Other ethnics        | 3(50.0)                     | 3(50.0)      | 0(0.0)    | 1(100)                     | 0(0.0)       | 0(0.0)    | 0(0.0)    | 0(0.0)       | 0(0.0)    |

543

544

545 **Table 5. Risk factors Parasites**

546

| Parasites                           | Factors                    | Adjusted Odd ratio (95% CI) | p-value  |
|-------------------------------------|----------------------------|-----------------------------|----------|
| <b>Helminths</b>                    |                            |                             |          |
| <b><i>Ascaris lumbricoides</i></b>  |                            |                             |          |
| Ethnic groups                       | Kako                       | 1                           |          |
|                                     | Baka                       | 4.04 (1.926- 8.80)          | < 0.0001 |
|                                     | Central African refugees   | 0.80 (0.02- 0.26)           | < 0.0001 |
|                                     | Other Ethnics              | 0.53 (0.32-0.87)            | 0.7      |
| Defecation place                    | Toilet                     | 1                           |          |
|                                     | Open defecation            | 3.37 (1.24- 9.10)           | 0.016    |
|                                     | Toilet and Open defecation | 1.162(0.44- 3.05)           | 0.760    |
| Disposal of garbage close to houses | No                         | 1                           |          |
|                                     | Yes                        | 2.80 (1.66-4.723))          | < 0.0001 |
| <b><i>Trichuris trichiura</i></b>   |                            |                             |          |
| Ethnic groups                       | Baka ethnic                | 2.99 (1.34-6.67)            | 0.007    |
|                                     | Central African Refugees   | 000                         | 0.995    |
|                                     | Other Ethnics              | 0.374 (0.04- 2.92)          | 0.349    |
|                                     |                            |                             |          |
| Defecation place                    | Toilet                     | 1                           |          |
|                                     | Open defecation            | 5.58 (2.55- 12.22)          | < 0.0001 |
|                                     | Toilet and Open defecation | 3.28 (0.983- 10.983)        | 0.053    |
| <b>Hookworm</b>                     |                            |                             |          |
| Water sources                       | Borehole water             | 1                           |          |
|                                     | Spring water               | 3.87 (1.42 - 10.56)         | 0.008    |
| <b>Protozoa</b>                     | Well water                 | 000                         | 0.999    |
| <b><i>Entamoeba coli</i></b>        |                            |                             |          |
| Ethnic groups                       | Kako                       | 1                           |          |
|                                     | Baka                       | 0.94 (0.46 - 1.89)          | 0.869    |
|                                     | Central African refugees   | 0.13 (0.06 - 0.26)          | <0.0001  |

|                                     |                          |                    |       |
|-------------------------------------|--------------------------|--------------------|-------|
|                                     | Other ethnics            | 0.72 (0.29 – 1.77) | 0.484 |
| Health areas                        | Ndelele                  | 1                  |       |
|                                     | Kentzou                  | 1.52 (0.87 – 2.66) |       |
|                                     | Lolo                     | 2.61 (1.24- 5.587) | 0.011 |
| Defecation place                    | Open defecation          | 2.16 (1.35-3.45)   | 0.001 |
|                                     | Toilet + open defecation | 3.05 (1.46-6.37)   | 0.003 |
| <b><i>Entamoeba histolytica</i></b> |                          |                    |       |
| Ethnic groups                       | Kako                     | 1                  |       |
|                                     | Baka                     | 0.84 (0.39 -1.83)  |       |
|                                     | Central African refugees | 0.37 (0.20 -0.68)  | 0.001 |
|                                     | Other ethnics            | 0.822 (0.29- 2.33) | 0.712 |
| <i>Giardia lamblia</i>              |                          |                    |       |
| Health area                         | Ndelele                  | 1                  |       |
|                                     | Kentzou                  | 3.73 (1.61- 8.64)  | 0.002 |
|                                     | Lolo                     | 0.31 (0.06 -1.47)  | 1.143 |
| Disposal of garbage near houses     | No                       | 1                  |       |
|                                     | Yes                      | 3.41 (1.52- 7.66)  | 0.003 |

---

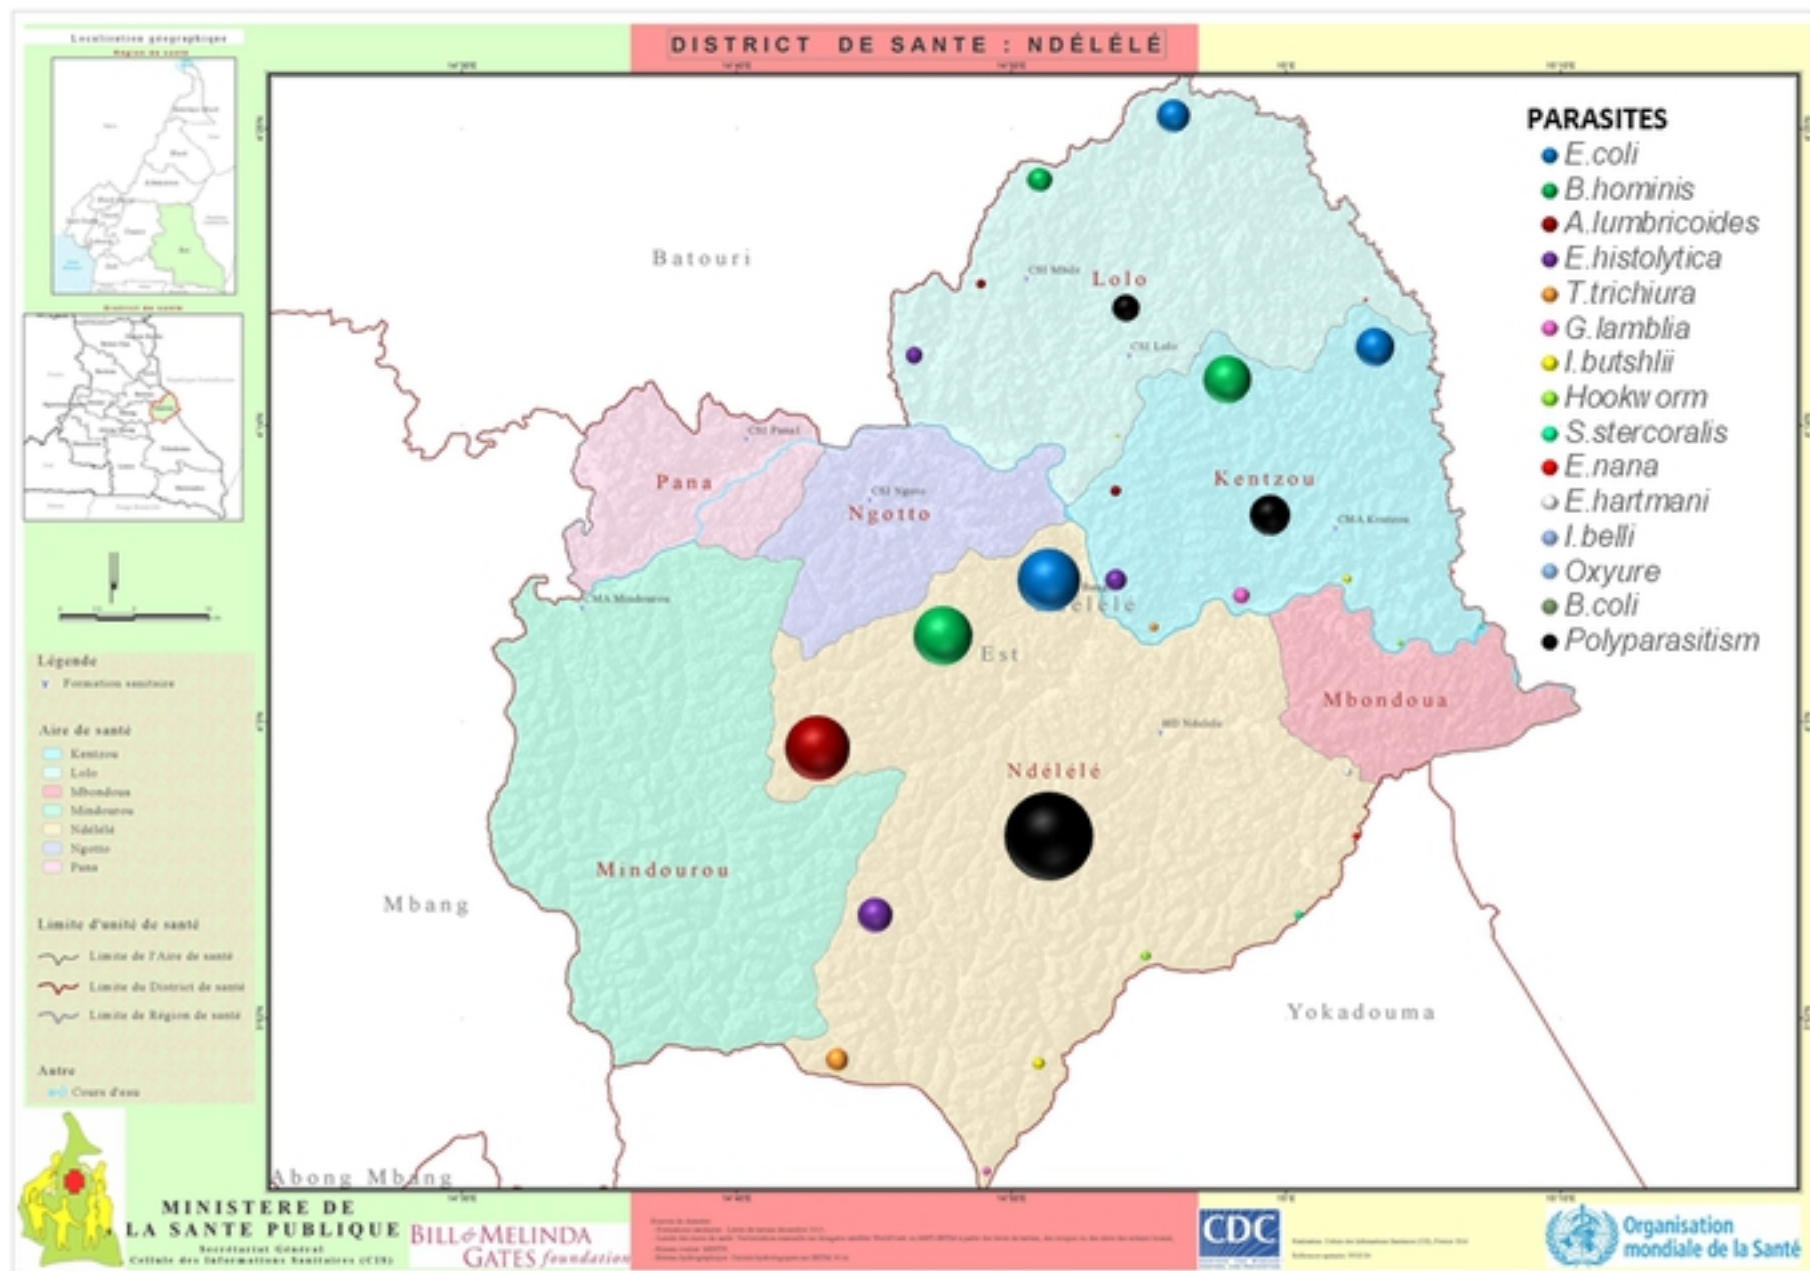

Figure

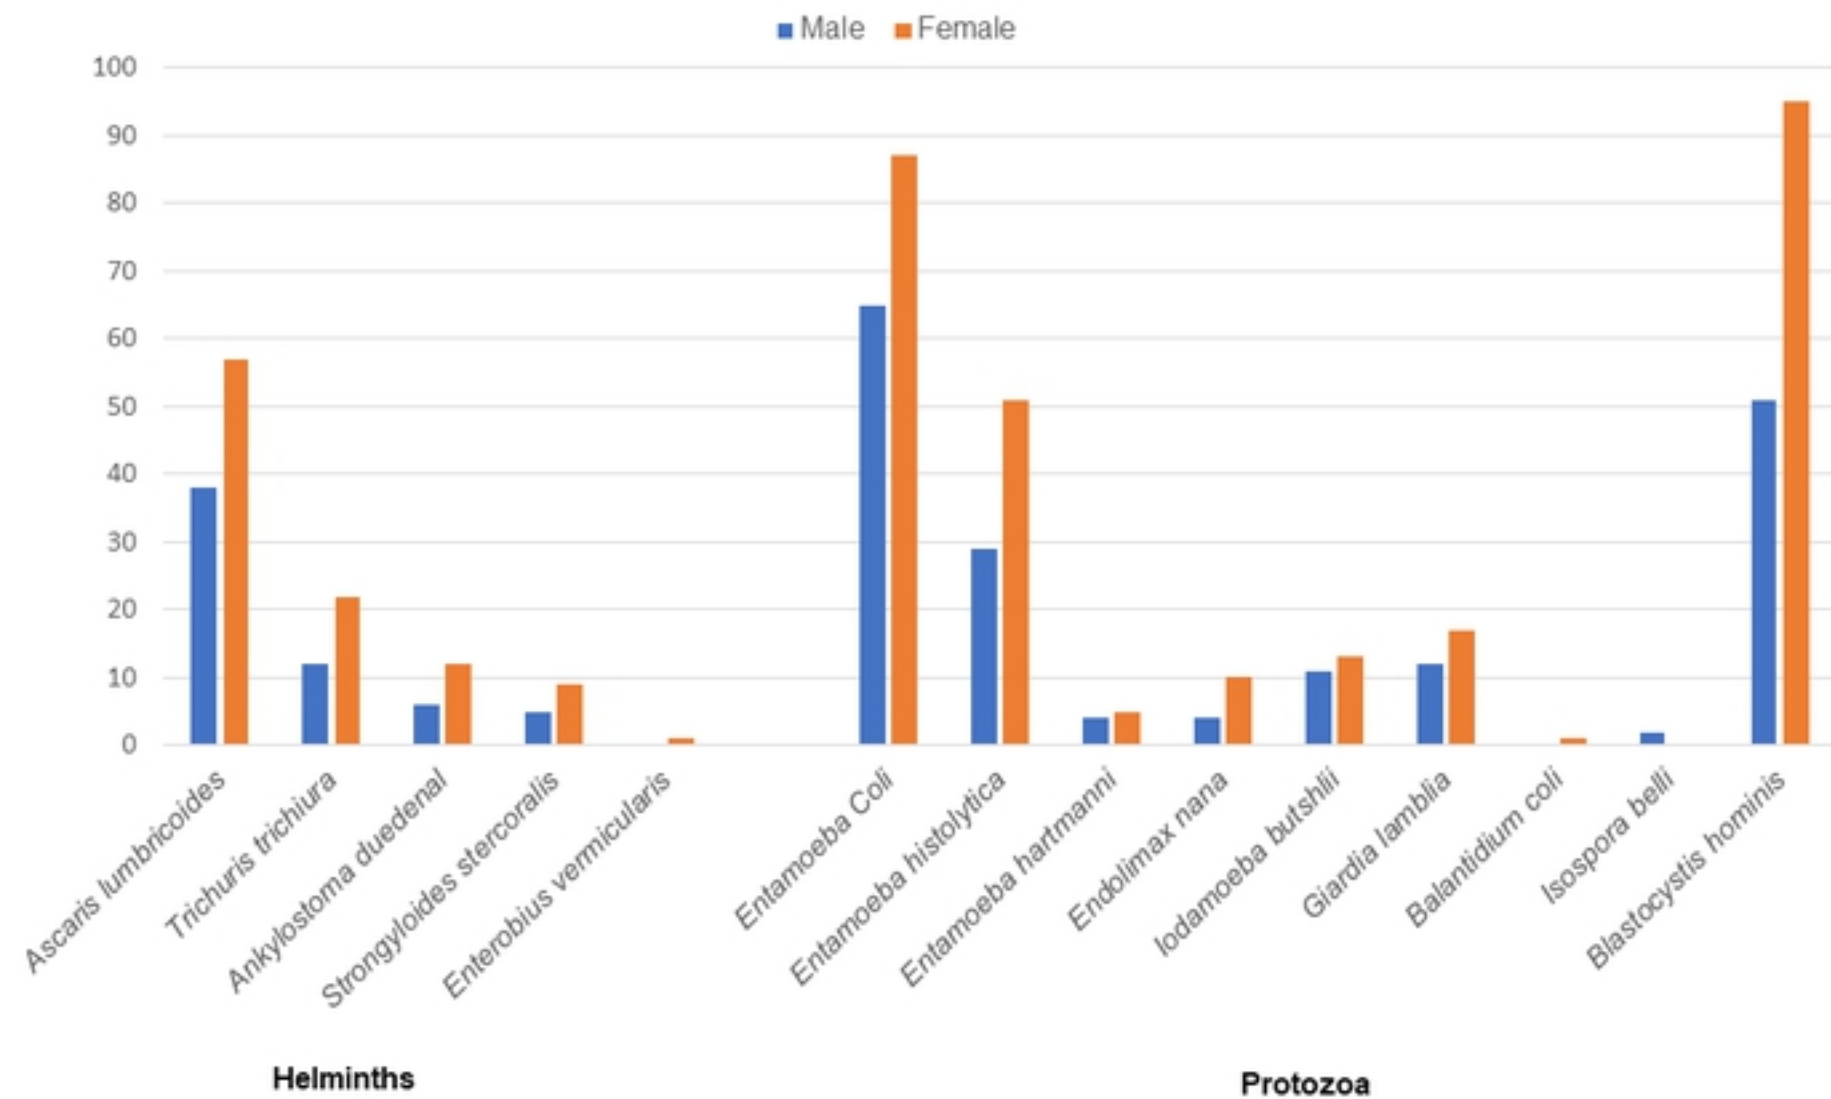

Figure
